# Supplementary material
Source: PubMed Central journal article supplement (PMC3421868)
Supplement: AAC.00245-12_zac999101170so1.pdf [file AAC.00245-12_zac999101170so1.pdf]

1 Supplemental Table 1: Cytotoxicity values of TMC647055 on different cell lines.

| Cell line | CC <sub>50</sub> (μM) <sup>1</sup> | n  |
|-----------|------------------------------------|----|
| VeroE6    | >100                               | 4  |
| MRC-5     | >100                               | 2  |
| HEK293T   | 50.2                               | 4  |
| HepG2     | 76.6                               | 5  |
| Huh7      | 42.1                               | 5  |
| MT4       | 28.9                               | 16 |

2 <sup>1</sup>CC<sub>50</sub> values are expressed as median values. n = number of independent measurements.

3

4  
5 Supplemental Figure 1:

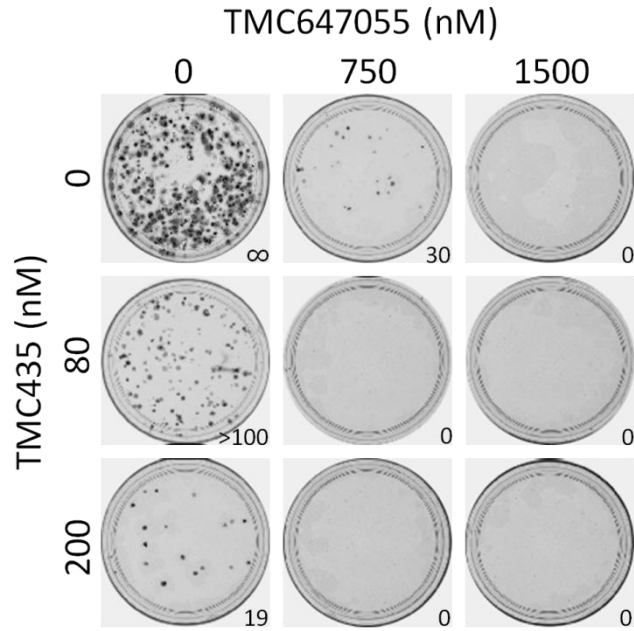

6

7 Supplemental figure 1: colony formation assay using Huh7-Luc replicon cells incubated with  
8 TMC647055 and TMC435, alone or in combination. The images are of cells treated with  
9 TMC647055 or TMC435 alone and in combination. The number of observed colonies is  
10 indicated.
